# Supplementary material
Source: Springer Nature journal article supplement (https://www.springermedizin.de/resource/supplementary/12936_2003_32_MOESM2_ESM.pdf/9546718)

# Indian Ocean

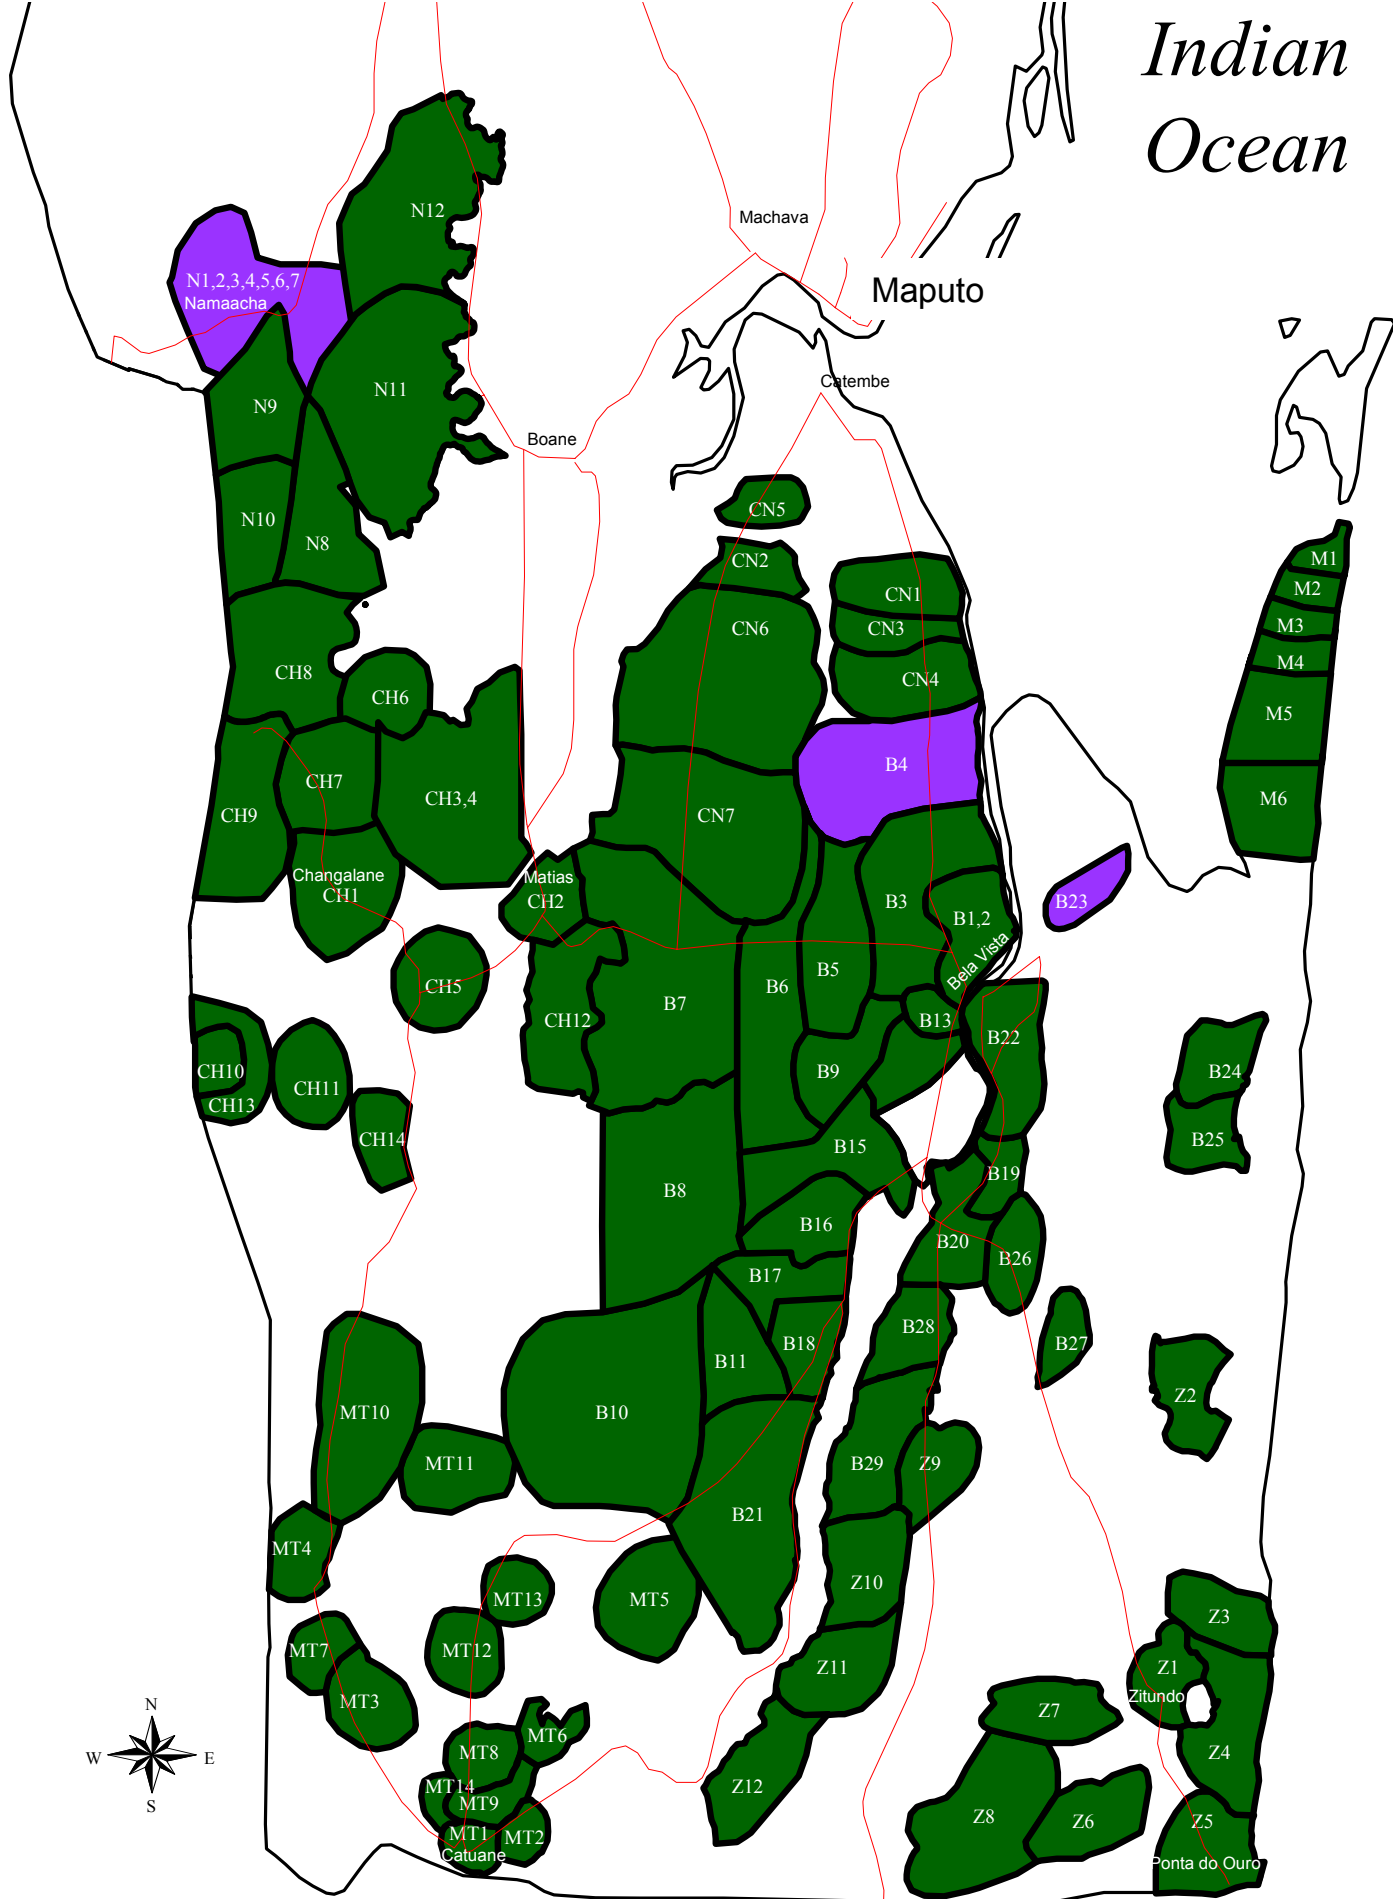

○ Localities  
— Roads

● Spraying completed (Ficam)  
● Spraying in progress

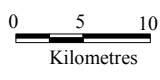

Supplement: MOESM2 [file 9546718]
